# Supplementary material for: Maternal and Postnatal High Linoleic Acid Diet Impacts Lipid Metabolism in Adult Rat Offspring in a Sex-Specific Manner
Source: PubMed Central journal article supplement (PMC7999727; doi:10.3390/ijms22062946), 2021-03-14
Supplement: ijms-22-02946-s001.pdf [file ijms-22-02946-s001.pdf]

Figure 1. Absolute organ weight.

| Organ Weight           | LLA Maternal Diet |               | HLA Maternal Diet |               | Two-Way ANOVA |            |      |
|------------------------|-------------------|---------------|-------------------|---------------|---------------|------------|------|
|                        | LLA PN Diet       | HLA PN Diet   | LLA PN Diet       | HLA PN Diet   | Pmaternal     | Ppostnatal | Pint |
| <b>Male</b>            |                   |               |                   |               |               |            |      |
| Left kidney            | 1.22 ± 0.0330     | 1.19 ± 0.0220 | 1.20 ± 0.0210     | 1.16 ± 0.0210 | ns            | ns         | ns   |
| Right kidney           | 1.23 ± 0.0330     | 0.16 ± 0.0280 | 1.18 ± 0.0220     | 1.15 ± 0.0240 | ns            | ns         | ns   |
| Left adrenal           | 0.02 ± 0.0008     | 0.02 ± 0.0020 | 0.02 ± 0.0004     | 0.02 ± 0.0010 | ns            | ns         | ns   |
| Right adrenal          | 0.02 ± 0.0010     | 0.02 ± 0.0010 | 0.02 ± 0.0020     | 0.02 ± 0.0010 | ns            | ns         | ns   |
| L. Kidney + L. Adrenal | 1.24 ± 0.0330     | 1.21 ± 0.020. | 1.22 ± 0.0220     | 1.18 ± 0.0210 | ns            | ns         | ns   |
| R. Kidney + R. Adrenal | 1.25 ± 0.0330     | 1.18 ± 0.0290 | 1.20 ± 0.0210     | 1.17 ± 0.0230 | ns            | ns         | ns   |
| Liver                  | 11.9 ± 0.2810     | 11.2 ± 0.270  | 11.4 ± 0.1840     | 11.1 ± 0.1710 | ns            | 0.03       | ns   |
| Heart                  | 1.29 ± 0.0580     | 1.27 ± 0.0500 | 1.27 ± 0.0230     | 1.23 ± 0.0170 | ns            | ns         | ns   |
| Brain                  | 2.09 ± 0.019      | 2.16 ± 0.0240 | 2.13 ± 0.0220     | 2.16 ± 0.0130 | ns            | 0.03       | ns   |
| GAS                    | 2.10 ± 0.0240     | 2.12 ± 0.0290 | 2.14 ± 0.0480     | 2.17 ± 0.0540 | ns            | ns         | ns   |
| SOL                    | 0.14 ± 0.0050     | 0.14 ± 0.0040 | 0.14 ± 0.0050     | 0.14 ± 0.0050 | ns            | ns         | ns   |
| TA                     | 0.64 ± 0.0250     | 0.59 ± 0.0200 | 0.61 ± 0.0190     | 0.62 ± 0.0200 | ns            | ns         | ns   |
| EDL                    | 0.19 ± 0.0050     | 0.20 ± 0.0050 | 0.19 ± 0.0040     | 0.19 ± 0.0070 | ns            | ns         | ns   |
| <b>Female</b>          |                   |               |                   |               |               |            |      |
| Left kidney            | 0.70 ± 0.0160     | 0.74 ± 0.0070 | 0.73 ± 0.0090     | 0.71 ± 0.0220 | ns            | ns         | 0.02 |
| Right kidney           | 0.70 ± 0.0170     | 0.76 ± 0.0070 | 0.73 ± 0.0080     | 0.73 ± 0.0150 | ns            | ns         | 0.04 |
| Left adrenal           | 0.03 ± 0.0040     | 0.03 ± 0.0020 | 0.03 ± 0.0010     | 0.03 ± 0.0020 | ns            | ns         | ns   |
| Right adrenal          | 0.02 ± 0.0020     | 0.03 ± 0.0020 | 0.03 ± 0.0020     | 0.03 ± 0.0020 | ns            | ns         | ns   |
| L. Kidney + L. Adrenal | 0.73 ± 0.0180     | 0.77 ± 0.0070 | 0.76 ± 0.0090     | 0.73 ± 0.020  | ns            | ns         | 0.02 |
| R. Kidney + R. Adrenal | 0.73 ± 0.0180     | 0.79 ± 0.0070 | 0.77 ± 0.0150     | 0.75 ± 0.0160 | ns            | ns         | 0.02 |
| Liver                  | 8.51 ± 0.2010     | 8.84 ± 0.0770 | 8.86 ± 0.1900     | 8.73 ± 0.2510 | ns            | ns         | ns   |
| Heart                  | 0.82 ± 0.0140     | 0.92 ± 0.0530 | 0.86 ± 0.0120     | 0.84 ± 0.0180 | ns            | ns         | 0.04 |
| Brain                  | 1.95 ± 0.0290     | 1.98 ± 0.0280 | 2.02 ± 0.0090     | 2.01 ± 0.0140 | ns            | ns         | ns   |
| GAS                    | 1.40 ± 0.0670     | 1.40 ± 0.0270 | 1.43 ± 0.0310     | 1.37 ± 0.0210 | ns            | ns         | ns   |
| SOL                    | 0.10 ± 0.0040     | 0.10 ± 0.0030 | 0.10 ± 0.0030     | 0.10 ± 0.0020 | ns            | ns         | ns   |
| TA                     | 0.40 ± 0.0100     | 0.41 ± 0.0060 | 0.40 ± 0.0060     | 0.39 ± 0.0130 | ns            | ns         | ns   |
| EDL                    | 0.12 ± 0.0030     | 0.12 ± 0.0020 | 0.13 ± 0.0060     | 0.13 ± 0.0050 | 0.02          | ns         | ns   |
| Left ovary             | 0.04 ± 0.0020     | 0.04 ± 0.0030 | 0.04 ± 0.0020     | 0.04 ± 0.0030 | ns            | ns         | ns   |
| Right ovary            | 0.04 ± 0.0020     | 0.04 ± 0.0020 | 0.04 ± 0.0020     | 0.04 ± 0.0020 | ns            | ns         | ns   |
